# Supplementary figures and images for: Genetic ablation of adipocyte PD-L1 reduces tumor growth but accentuates obesity-associated inflammation
Source: PubMed Central journal article supplement — J Immunother Cancer. 2020 Aug 17;8(2):e000964. doi: 10.1136/jitc-2020-000964 (PMC7437875; doi:10.1136/jitc-2020-000964), 2020-08-17

## Supplemental Figure 1. PD-L1 expression remain unchanged in non-adipose tissue of KO mice

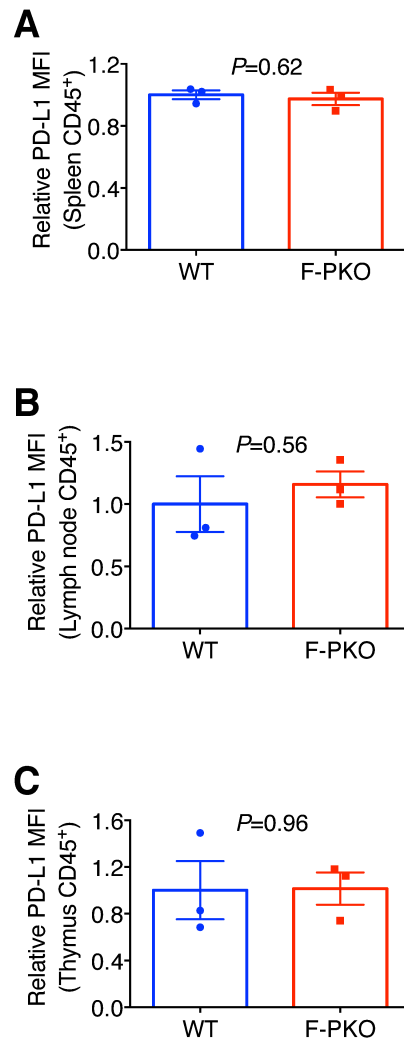

Supplement: jitc-2020-000964supp001.pdf [file jitc-2020-000964supp001.pdf]

## Supplemental Figure 3. Flow cytometry for E0771 tumor infiltrating lymphocytes

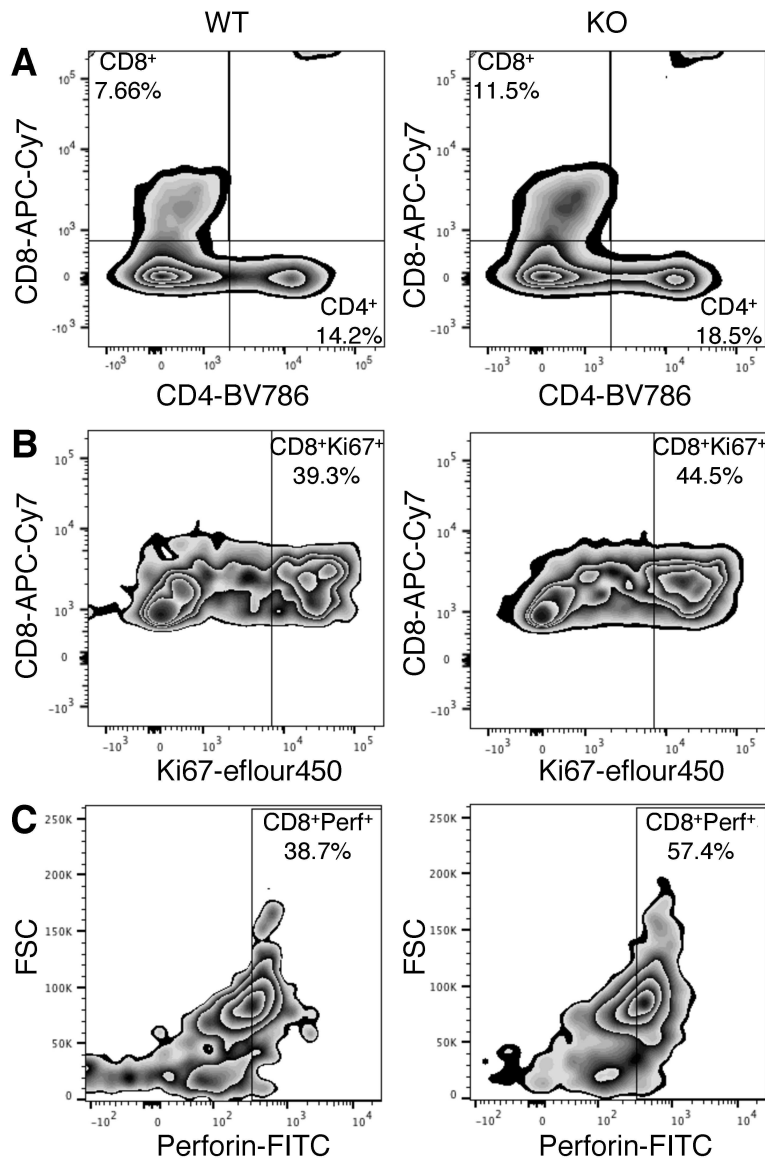

Supplement: jitc-2020-000964supp003.pdf [file jitc-2020-000964supp003.pdf]
